# Supplementary material for: Biaxial strain modulated electronic structures of layered two-dimensional MoSiGeN4 Rashba systems
Source: Royal Society of Chemistry journal article supplement (doi:10.1039/d3cp03833e), 2023-11-22
Supplement: d3cp03833e1.pdf [file d3cp03833e1.pdf]

*Supplemental Material*

**Biaxial strain modulated electronic structure of layered two-dimensional MoSiGeN<sub>4</sub> Rashba systems**

Puxuan Li<sup>1#</sup>, Xuan Wang<sup>1,2\*#</sup>, Haoyu Wang<sup>1</sup>, Qikun Tian<sup>1,3</sup>, Jinyuan Xu<sup>3</sup>, Linfeng Yu<sup>3</sup>, Guangzhao Qin<sup>3\*</sup>,  
Zhenzhen Qin<sup>1\*</sup>

<sup>1</sup>*International Laboratory for Quantum Functional Materials of Henan, and School of Physics and Microelectronics, Zhengzhou University, Zhengzhou 450001, P. R. China*

<sup>2</sup>*Institute for Frontiers in Astronomy and Astrophysics, Department of Astronomy, Beijing Normal University, Beijing 100875, P. R. China*

<sup>3</sup>*National Key Laboratory of Advanced Design and Manufacturing Technology for Vehicle, College of Mechanical and Vehicle Engineering, Hunan University, Changsha 410082, P. R. China*

---

# These authors contributed equally to this work.

\*Corresponding author: gzzqin@hnu.edu.cn; qzz@zzu.edu.cn

**(a) The change of Geometry Structures under biaxial strain**

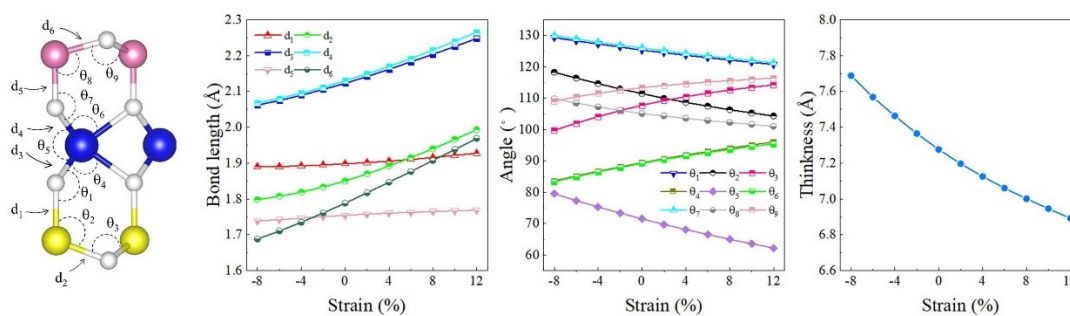

Fig. S1. The schematic diagram of structural parameters and the changes of band length, band angle and thickness under biaxial strains. The thickness and  $\theta_1$ ,  $\theta_2$ ,  $\theta_5$ ,  $\theta_7$ ,  $\theta_8$  of MoSiGeN<sub>4</sub> increases with the decrease of compressive strain and decreases as tensile strain increase, a trend opposite to that of bonds length and  $\theta_3$ ,  $\theta_4$ ,  $\theta_6$ ,  $\theta_9$ .

**(b) Band structure of MoSi<sub>2</sub>N<sub>4</sub> and MoSiGeN<sub>4</sub> by using HSE and PBE**

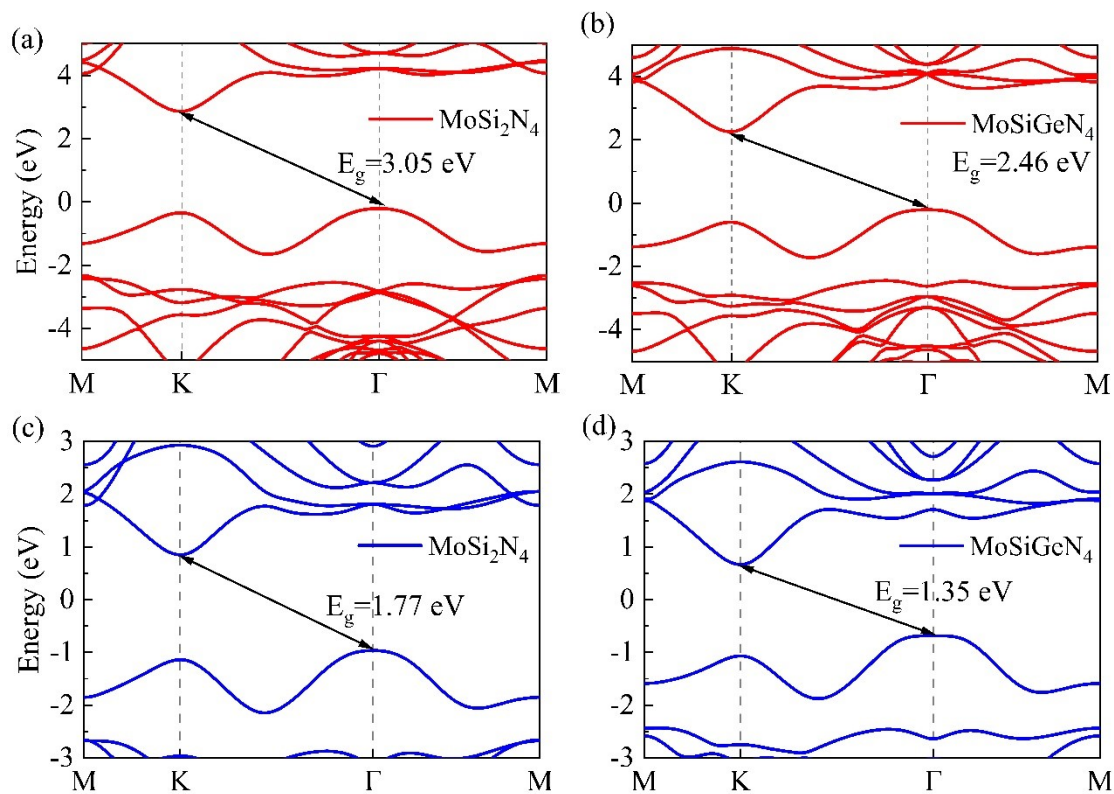

Fig. S2. The band structure of MoSi<sub>2</sub>N<sub>4</sub> (a) and MoSiGeN<sub>4</sub> (b) by using HSE functional (red line). The band structure of MoSi<sub>2</sub>N<sub>4</sub> (c) and MoSiGeN<sub>4</sub> (d) by using PBE functional (blue line).

### (c) The Geometry Structures of bilayer MoSiGeN<sub>4</sub>

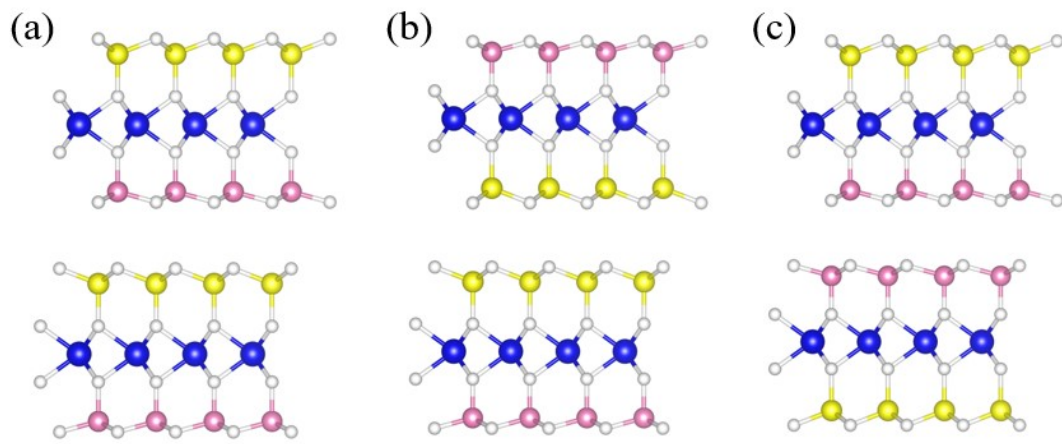

Fig. S3. The three stacking structures of (a) Si<sub>top</sub>-Ge<sub>bot</sub> (b) Ge<sub>top</sub>-Ge<sub>bot</sub> and (c) Si<sub>top</sub>-Si<sub>bot</sub> for bilayer MoSiGeN<sub>4</sub>.

### (d) Ab-initio Molecular Dynamics

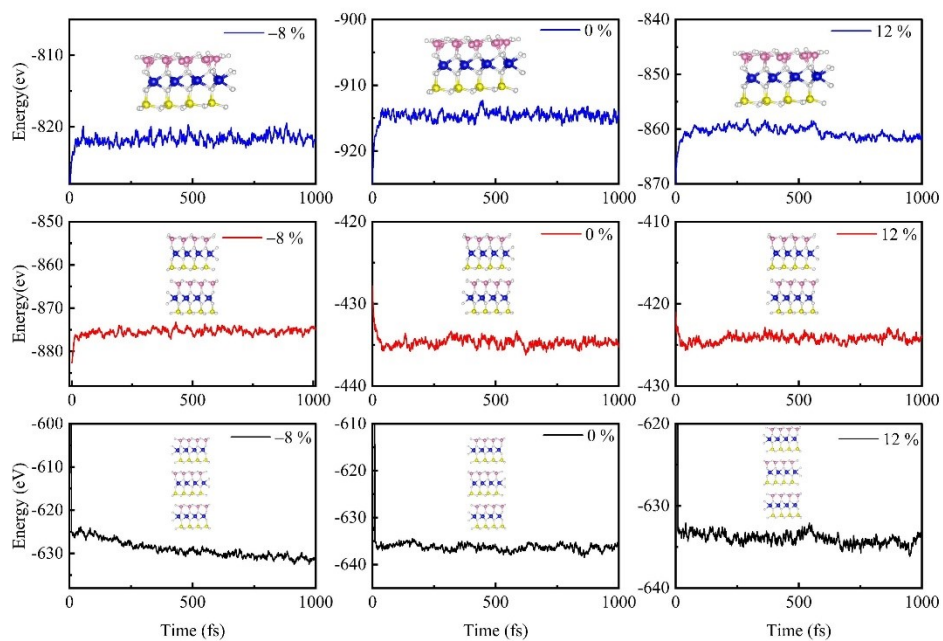

Fig. S4. The ab initio molecular dynamics (AIMD) of MoSiGeN<sub>4</sub> monolayer (blue line), bilayer (red line) and trilayer (black line) under different strains (-8%, 0% and 12%).

**(e) The orbital-projected band structure of MoSiGeN<sub>4</sub> monolayer**

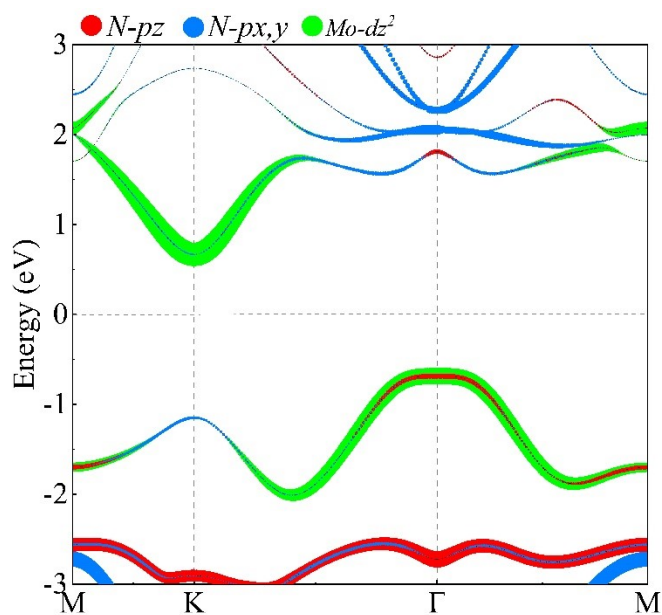

Fig. S5. The orbital-projected band structures of MoSiGeN<sub>4</sub> monolayer. The color of red, blue and green are the contribution of N-*p*, N-*p<sub>x,y</sub>* and Mo-*dz<sup>2</sup>*, respectively.

**(f) The orbital-projected band structures of MoSiGeN<sub>4</sub> multilayer**

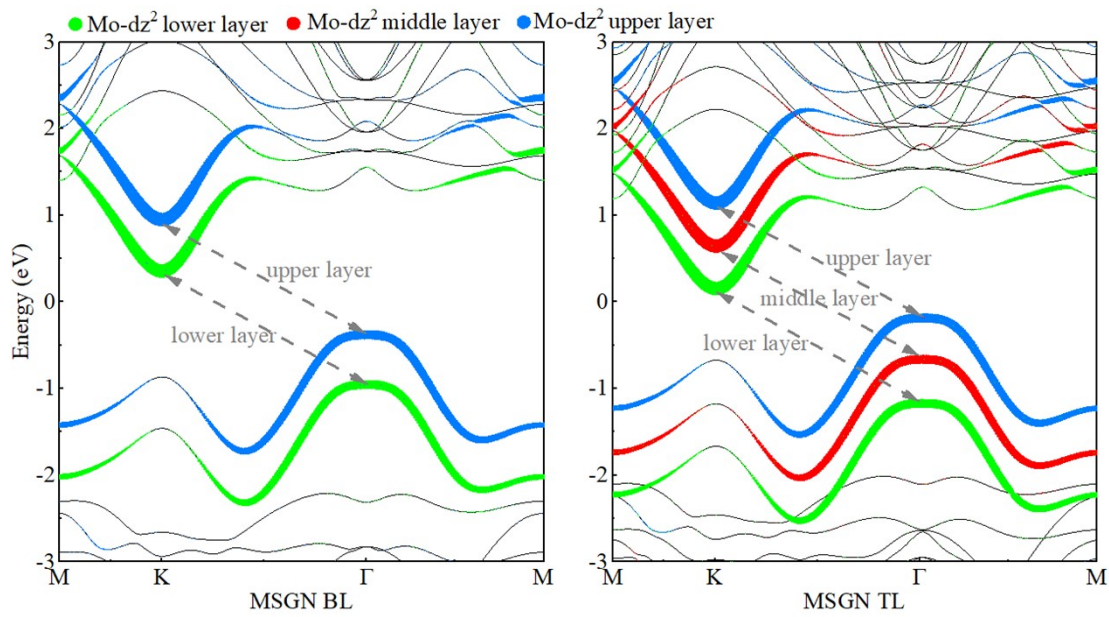

Fig. S6. The orbital-projected band structures of MoSiGeN<sub>4</sub> bilayer (MSGN BL) and MoSiGeN<sub>4</sub> trilayer (MSGN TL). The color of green, red and blue are the contribution of Mo-dz<sup>2</sup> in the upper layer, middle layer and the lower layer, respectively.

**(g) The band structure of trilayer MoSiGeN<sub>4</sub>**

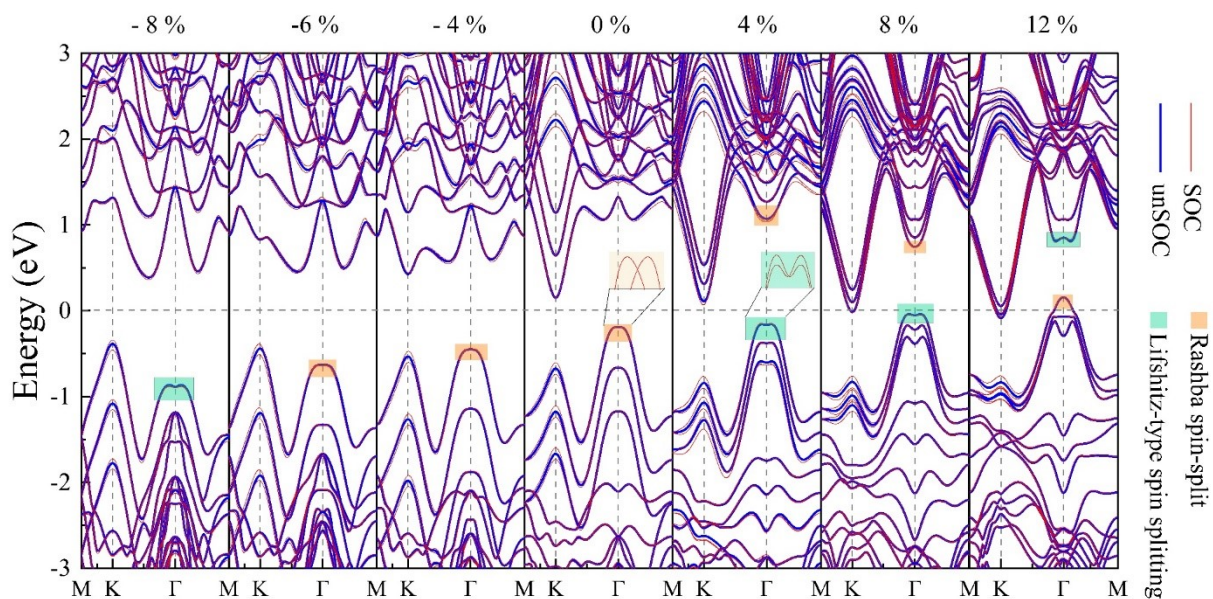

Fig. S7. Band structure of trilayer MoSiGeN<sub>4</sub> under biaxial strains considering without (blue lines) and with SOC (red lines). The enlarged drawing of Rashba spin splitting (orange patch) and Lifshitz-type spin splitting (green patch) are shown in the inset.



## (h) The dipole moment and electronic structures of MoSiGeN<sub>4</sub> monolayer and multilayer

Table SI: The dipole moment  $P$ , band gap  $E_g$ , Rashba coefficient  $\alpha_R$ , Mexican coefficient  $M$ , L coefficient  $E_{1-2}$ ,  $E_{2-3}$ ,  $k_f$  and  $k_L$  of MoSiGeN<sub>4</sub> monolayer, bilayer and trilayer. Dip. denotes include dipole corrections in calculations with VASP.

| Structure          | Monolayer               |                      | Bilayer                 |                      | Trilayer               |                      |
|--------------------|-------------------------|----------------------|-------------------------|----------------------|------------------------|----------------------|
|                    | 0 %                     | 8 %                  | 0 %                     | 8 %                  | 0 %                    | 8 %                  |
| $P$ (e $\times$ Å) | 0.026                   | 0.009                | 0.054                   | 0.021                | 0.064                  | 0.027                |
| $E_g$ (eV)         | 1.35 (Dip.)<br>1.35     | 0.29(Dip.)<br>0.30   | 0.64 (Dip.)<br>0.76     | 0.005(Dip.)<br>0.01  | 0.48(Dip.)<br>0.38     | 0.003<br>0.001       |
| $M$ (eVÅ)          | --                      | 0.87(Dip.)<br>0.68   | --                      | 0.30(Dip.)<br>0.52   | --                     | 0.24(Dip.)<br>0.39   |
| $\alpha_R$ (meVÅ)  | 63.025 (Dip.)<br>61.073 | --                   | 35.026 (Dip.)<br>37.424 | --                   | 24.395(Dip.)<br>19.968 | --                   |
| $E_{1-2}$          | --                      | 0.006(Dip.)<br>0.006 | --                      | 0.007(Dip.)<br>0.007 | --                     | 0.006(Dip.)<br>0.006 |
| $E_{2-3}$          | --                      | 0.17(Dip.)<br>0.13   | --                      | 0.038(Dip.)<br>0.035 | --                     | 0.006(Dip.)<br>0.007 |
| $k_f$              | --                      | 0.02(Dip.)<br>0.02   | --                      | 0.04(Dip.)<br>0.04   | --                     | 0.03(Dip.)<br>0.03   |
| $k_L$              | --                      | 0.20(Dip.)<br>0.20   | --                      | 0.15(Dip.)<br>0.14   | --                     | 0.12(Dip.)<br>0.12   |

### (i) The Rashba constants of MoSiGeN<sub>4</sub> monolayer and multilayer

Table SII: The  $k_0$ ,  $E_R$ ,  $\alpha_R$  and position of Rashba effect in MoSiGeN<sub>4</sub> monolayer, bilayer and trilayer under biaxial strains.  $V_1$  denotes the highest valence band at  $\Gamma$  point, and  $C_1$  denotes the lowest conduction band at  $\Gamma$  point.

| <i>Structure</i> | <i>Strain (%)</i> | <i>Position (<math>\Gamma</math>)</i> | $k_0$ ( $\text{\AA}^{-1}$ ) | $E_R$ (meV) | $\alpha_R$ (meV $\text{\AA}$ ) |
|------------------|-------------------|---------------------------------------|-----------------------------|-------------|--------------------------------|
| <i>Monolayer</i> | -6                | $V_1$                                 | 0.150                       | 4.378       | 58.380                         |
|                  | -4                | $V_1$                                 | 0.070                       | 1.700       | 48.220                         |
|                  | -2                | $V_1$                                 | 0.043                       | 0.710       | 32.302                         |
|                  | 0                 | $V_1$                                 | 0.070                       | 2.206       | 63.025                         |
|                  | 2                 | $C_1$                                 | 0.036                       | 2.360       | 13.038                         |
|                  | 4                 | $C_1$                                 | 0.019                       | 2.800       | 28.448                         |
|                  | 6                 | $C_1$                                 | 0.041                       | 3.130       | 149.540                        |
|                  | 8                 | $C_1$                                 | 0.102                       | 16.500      | 324.450                        |
| <i>Bilayer</i>   | -6                | $V_1$                                 | 0.091                       | 4.000       | 87.912                         |
|                  | -4                | $V_1$                                 | 0.013                       | 0.100       | 15.384                         |
|                  | -2                | $V_1$                                 | 0.072                       | 0.560       | 15.448                         |
|                  | 0                 | $V_1$                                 | 0.024                       | 0.420       | 35.026                         |
|                  | 2                 | $C_1$                                 | 0.006                       | 1.151       | 381.12                         |
|                  | 4                 | $C_1$                                 | 0.018                       | 1.423       | 240.37                         |
|                  | 6                 | $C_1$                                 | 0.016                       | 1.842       | 173.72                         |
|                  | 8                 | $C_1$                                 | 0.016                       | 9.598       | 327.15                         |
| <i>Trilayer</i>  | -6                | $V_1$                                 | 0.075                       | 2.370       | 62.434                         |
|                  | -4                | $V_1$                                 | 0.042                       | 0.405       | 19.148                         |
|                  | -2                | $V_1$                                 | 0.024                       | 0.250       | 20.815                         |
|                  | 0                 | $V_1$                                 | 0.062                       | 0.627       | 24.395                         |
|                  | 2                 | $C_1$                                 | 0.059                       | 3.552       | 118.459                        |
|                  | 4                 | $C_1$                                 | 0.017                       | 1.307       | 154.583                        |
|                  | 6                 | $C_1$                                 | 0.019                       | 1.563       | 163.152                        |
|                  | 8                 | $C_1$                                 | 0.093                       | 15.108      | 324.449                        |
